# Supplementary material
Source: PubMed Central journal article supplement (PMC5460834)
Supplement: en.2016-1791.st1.pdf [file en.2016-1791.st1.pdf]

**Table S1. Primer Sequences for qPCR**

| <b>β-cell targets</b> | <b>5' Sequence (5' to 3')</b> | <b>3' Sequence (3' to 5')</b> |
|-----------------------|-------------------------------|-------------------------------|
| <i>MafA</i>           | GAGGAGGTCATCCGACTGAAA         | GCACTTCTCGCTCTCCAGAAT         |
| <i>Gck</i>            | CTGTTAGCAGGATGGCAGCTT         | TTCCTGGAGAGATGCTGTGG          |
| <i>Ins1</i>           | AGGACCCACAAGTGGAACAAC         | GTGCAGCACTGATCCACAATG         |
| <i>Ins2</i>           | GGCTTCTTCTACACACCCAT          | CCAAGGTCTGAAGGTCACCT          |
| <i>Glp1R</i>          | TGAGGTCCAGATGGAGTTTCG         | TTCATGCTGCAGTCTCTCTGG         |
| <i>Slc2a2</i>         | CTCCAGGAAGGGTGCTAAACC         | TGCTCCCTATCCGTTCTTCAA         |
| <i>Ldb1</i>           | ACTCATGTGGATGCCTGTGTG         | CCCCAACATTTAGCCCCTAAG         |
| HK: <i>Gapdh</i>      | CCTGGAGAAACCTGCCAAGTA         | TGGAAGAGTGGGAGTTGCTGT         |

| <b>BAT Targets</b> | <b>5' Sequence (5' to 3')</b> | <b>3' Sequence (3' to 5')</b> |
|--------------------|-------------------------------|-------------------------------|
| <i>Fgf21</i>       | CTGCTGGGGGTCTACCAAG           | CTGCGCCTACCACTGTTCC           |
| <i>Ucp1</i>        | ACTGCCACACCTCCAGTCATT         | CTTTGCCTCACTCAGGATTGG         |
| <i>Cox7a1</i>      | CAGCGTCATGGTCAGTCTGT          | AGAAAACCGTGTGGCAGAGA          |
| <i>Cidea</i>       | TGCTCTTCTGTATCGCCCAGT         | CTTTGCCTCACTCAGGATTGG         |
| <i>Pgc1α</i>       | CCCTGCCATTGTTAAGACC           | TGCTGCTGTTCTGTTTTTC           |
| <i>Dio2</i>        | CAGTGTGGTGCACGTCTCCAATC       | TGAACCAAAGTTGACCACCAG         |
| <i>Elovl3</i>      | TCCGCGTTTCATGTAGGTCT          | GGACCTGATGCAACCCTATGA         |
| HK: <i>Hprt</i>    | AAGGAGATGGGAGGCCAT            | GTTGAGAGATCATCTCCACCAAT       |
| HK: <i>36B4</i>    | GCGACCTGGAAGTCCAACACTAC       | ATCTGCTGCATCTGCTTGG           |
