# Supplementary material
Source: PubMed Central journal article supplement (PMC5460834)
Supplement: en.2016-1791.st2.pdf [file en.2016-1791.st2.pdf]

| <b>Supplemental Table 2. Circulating Factors in <i>Ldb1</i><sup>+/-</sup> Mice (pg/ml)</b> |                |                            |
|--------------------------------------------------------------------------------------------|----------------|----------------------------|
|                                                                                            | <i>CTL</i>     | <i>Ldb1</i> <sup>+/-</sup> |
| Ghrelin                                                                                    | 13714 ± 919.1  | 12774 ± 635.8              |
| GIP                                                                                        | 579 ± 65.88    | 660 ± 59.5                 |
| GLP1                                                                                       | 146.5 ± 13.2   | 130.6 ± 12.1               |
| Leptin                                                                                     | 23737 ± 3809   | 18428 ± 2547               |
| PAI-1                                                                                      | 1058 ± 103.3   | 1146 ± 105.7               |
| Resistin                                                                                   | 124294 ± 6088  | 128469 ± 7457              |
| Glucagon                                                                                   | 318.1 ± 26.5   | 360 ± 21.6                 |
| TSH                                                                                        | 1309 ± 81.7    | 1618 ± 172                 |
| T3                                                                                         | 18008 ± 2092   | 23466 ± 1375*              |
| T4                                                                                         | 491417 ± 55193 | 629124 ± 27879*            |

**Supplemental Table 2. Circulating Factors in *Ldb1*<sup>+/-</sup> Mice.** GIP – Glucose-dependent insulinotropic peptide, GLP-1 – Glucagon-like peptide 1, PAI-1 – Plasminogen activator inhibitor-1, TSH – Thyroid-stimulating hormone, T3 – triiodothyronine, T4 – Thyroxine. Values are mean ± SEM. \**p* < 0.05 as compared to control (CTL).
